# Supplementary material for: Insect Gut Isolate Pseudomonas sp. Strain Nvir Degrades the Toxic Plant Metabolite Nitropropionic Acid
Source: PubMed Central journal article supplement (PMC9552603; doi:10.1128/aem.00719-22), 2022-09-26
Supplement: aem.00719-22-s0001.pdf [file aem.00719-22-s0001.pdf]

1 **Supplementary material**

2 **Supplementary Table 1. Summary of the *Pseudomonas* sp. Nvir genome features.**

3 Genome of *Pseudomonas* sp. Nvir was sequenced with Illumina MiSeq Sequencer. Genome  
4 binning was performed for contigs greater than 1500 bp. The genomes were automatically  
5 annotated with Prokka 1.13.4.

|                              |         |
|------------------------------|---------|
| <b>Genome size (bp)</b>      | 5716865 |
| <b>Completeness</b>          | 99.34%  |
| <b>Contamination</b>         | 1.85%   |
| <b>Strain heterogeneity</b>  | 0       |
| <b>Contigs</b>               | 210     |
| <b>Plasmids</b>              | Unknown |
| <b>Total number of genes</b> | 5464    |
| <b>CDS</b>                   | 5320    |
| <b>rRNAs</b>                 | 4       |
| <b>tRNAs</b>                 | 70      |
| <b>tmRNAs</b>                | 1       |
| <b>G+C content</b>           | 62.3%   |

6

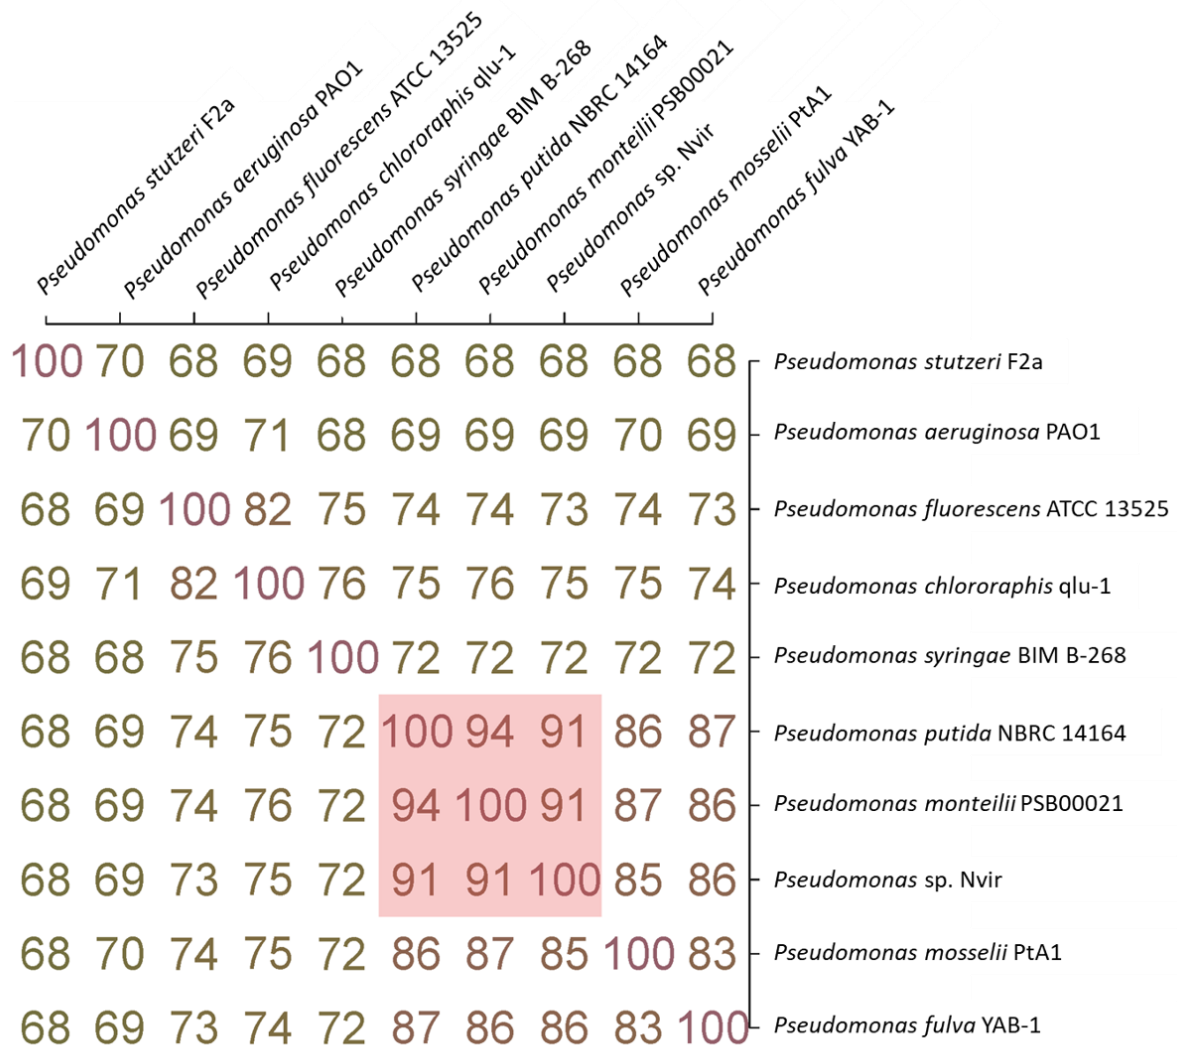

8

9 **Supplementary Figure 1. The analysis of Average Amino acid Identity (AAI) of**

10 ***Pseudomonas* sp. Nvir.** AAI analysis was executed with online tool ([http://enve-](http://enve-omics.ce.gatech.edu/)  
 11 [omics.ce.gatech.edu/](http://enve-omics.ce.gatech.edu/), 2021) as described (Goris, Konstantinidis et al. 2007, Rodriguez-R and  
 12 Konstantinidis 2016). Briefly, ten genomes of *Pseudomonas* sp. genuses were obtained from  
 13 NCBI database and aligned together with *Pseudomonas* sp. Nvir of this study. AAI matrix was  
 14 calculated based on best hits (one-way AAI) and reciprocal best hits (two-way AAI) between  
 15 genomic datasets.

16

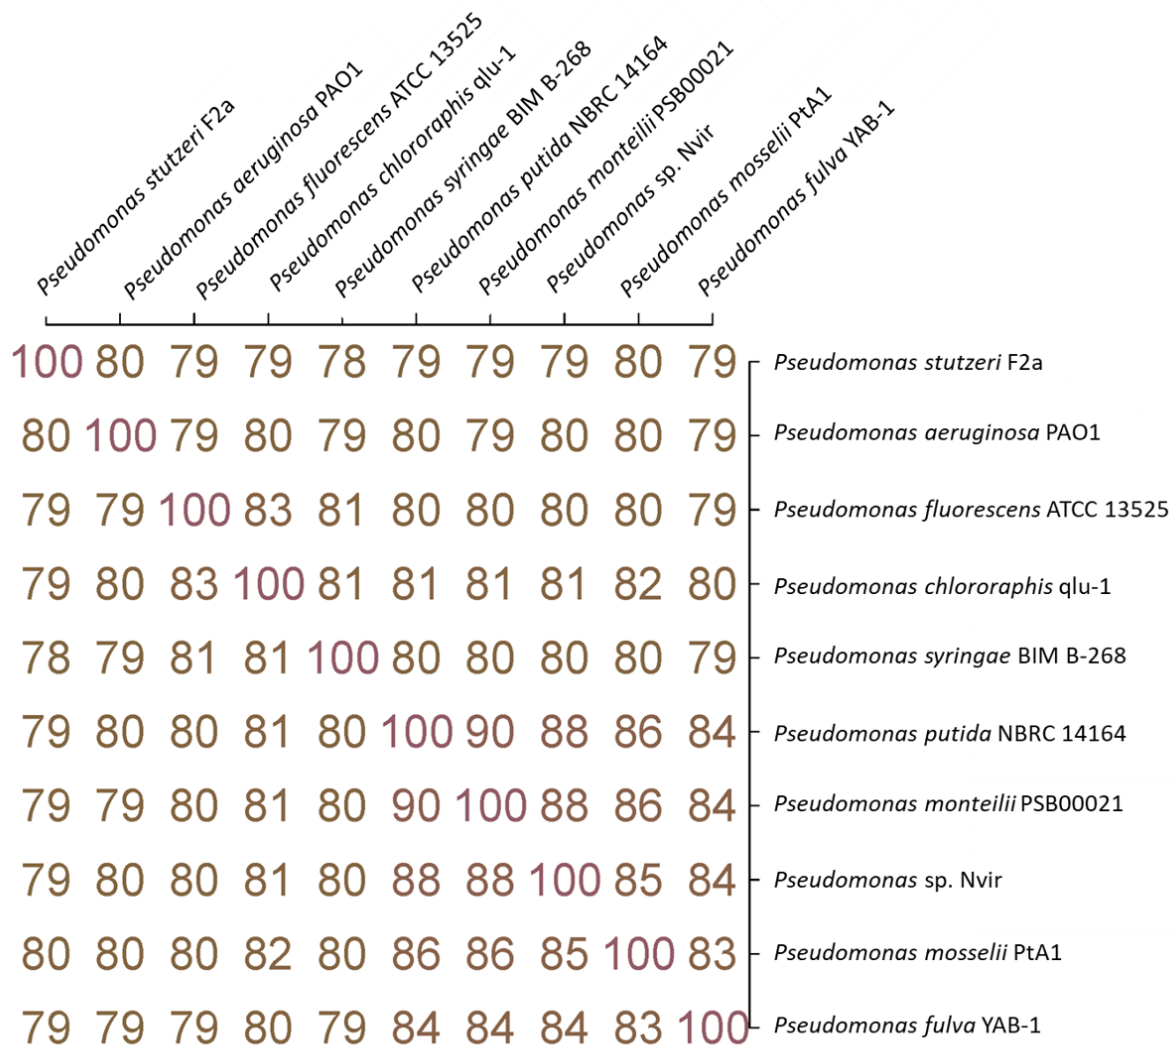

17

18 **Supplementary Figure 2. The analysis Average Nucleotide Identity (ANI) of**  
 19 ***Pseudomonas* sp. Nvir.** ANI analysis was executed with online tool ([http://enve-](http://enve-omics.ce.gatech.edu/)  
 20 [omics.ce.gatech.edu/](http://enve-omics.ce.gatech.edu/), 2021) as described (Goris, Konstantinidis et al. 2007, Rodriguez-R and  
 21 Konstantinidis 2016). Briefly, ten genomes of *Pseudomonas* sp. genuses were obtained from  
 22 NCBI database and aligned together with *Pseudomonas* sp. Nvir of this study. ANI matrix was  
 23 calculated based on best hits (one-way ANI) and reciprocal best hits (two-way ANI) between  
 24 genomic datasets.

25

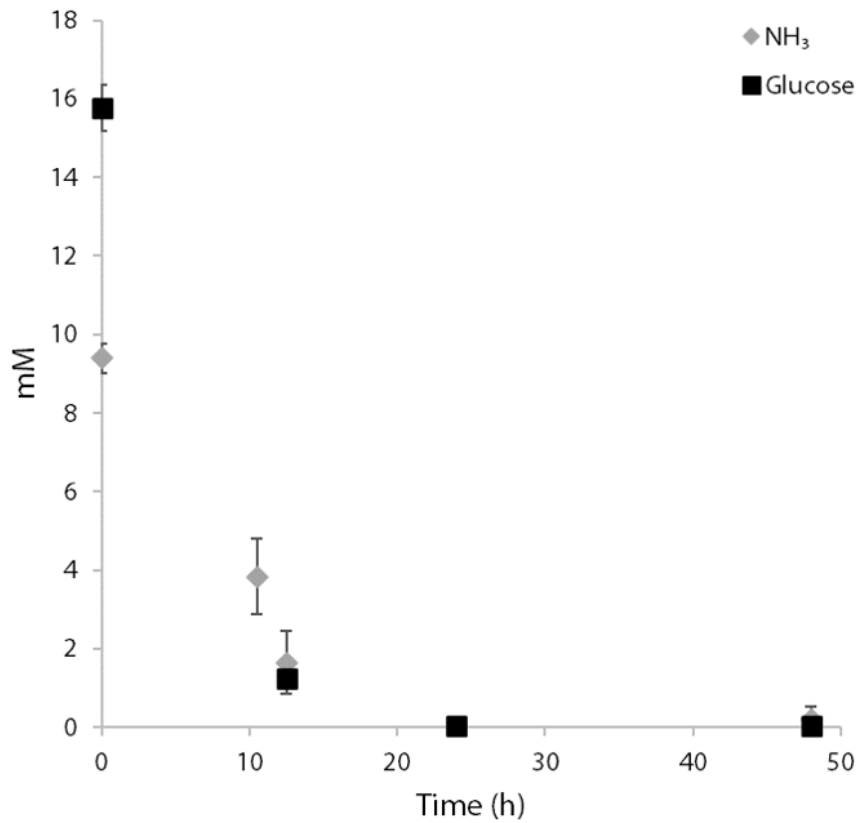

26

27 **Supplementary Figure 3. Glucose and ammonium measurements over 48 hours in**  
 28 ***Pseudomonas sp. Nvir* cultures.** The medium was inoculated with approximately 20 µg  
 29 protein/mL biomass and pre-grown in an M9 mineral medium containing glucose and  
 30 ammonium. Subsequently, *Pseudomonas sp. Nvir* cultures were grown for 24 hours upon  
 31 glucose and ammonia were depleted from the medium. Glucose and ammonium  
 32 concentrations were also monitored at 48h. Data are represented as mean +/- standard error  
 33 (n=3).

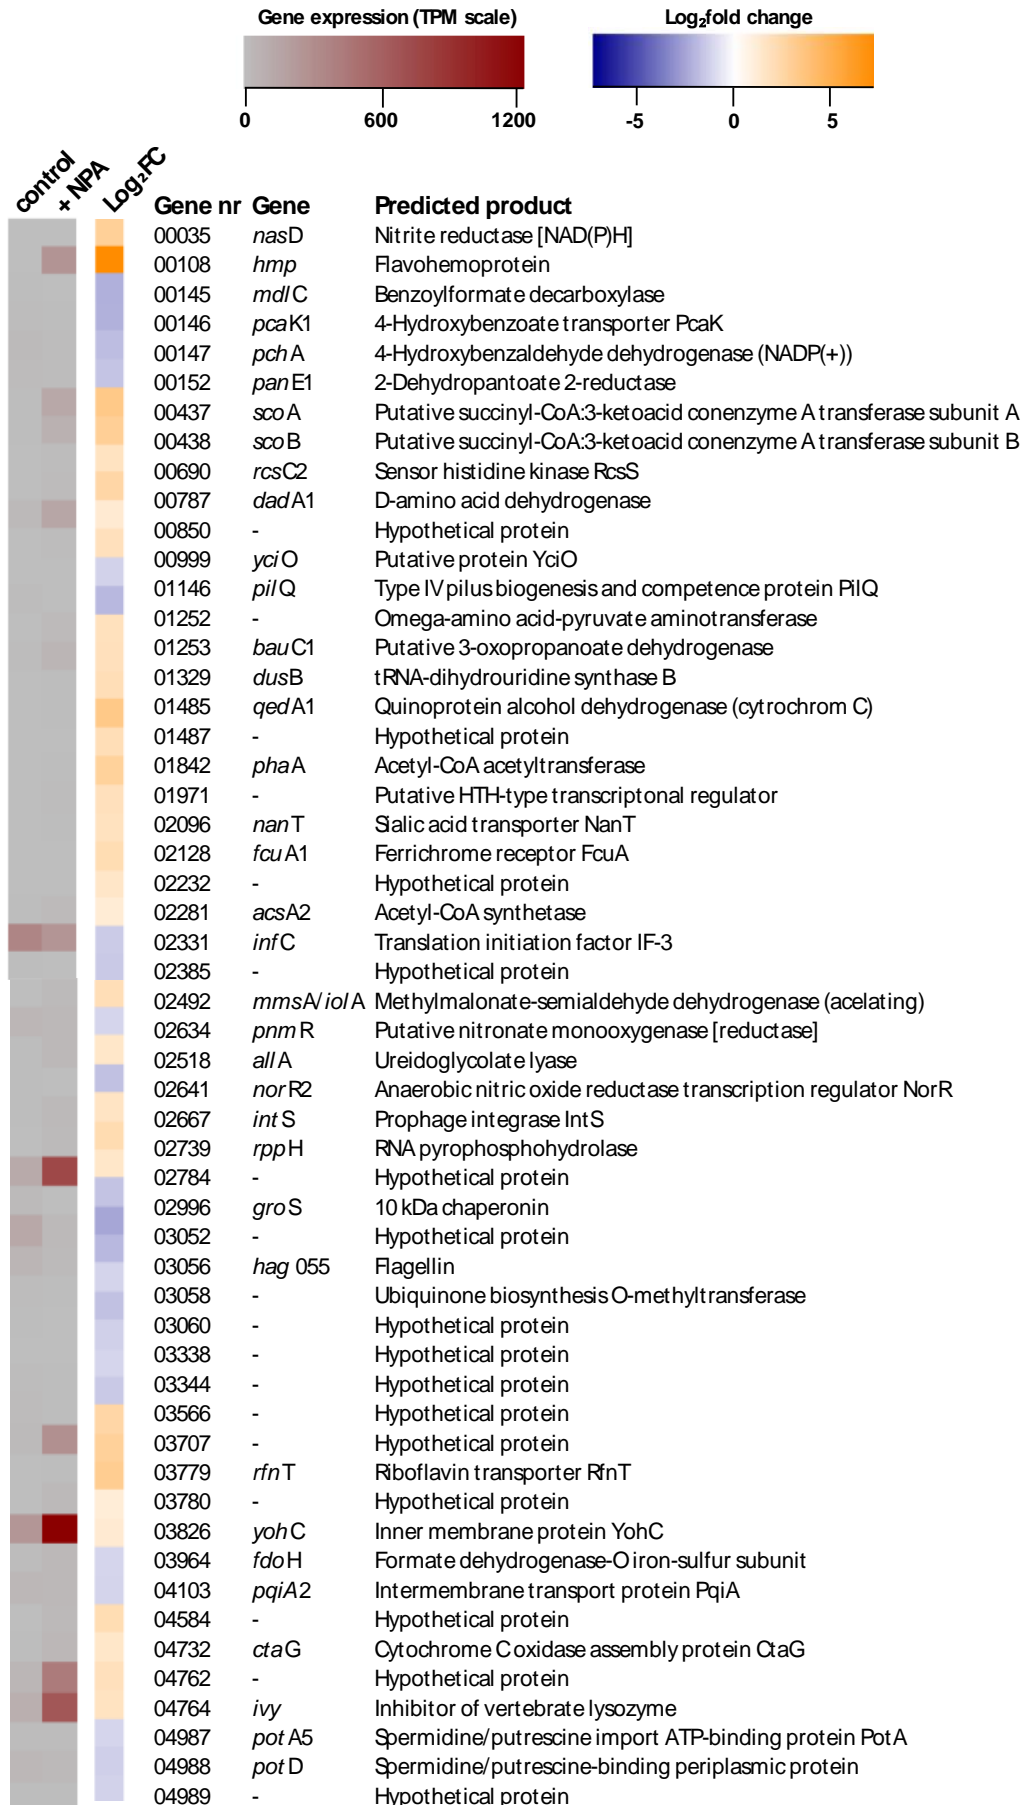

35 **Supplementary Figure 4. *Pseudomonas* sp. Nvir differential gene expression profile**  
 36 **under NPA conditions.** *Pseudomonas* sp. Nvir cultures grew in an M9 mineral medium  
 37 supplemented with glucose and ammonium. After 24h C/N depletion phase, 100  $\mu$ M of NPA  
 38 was added to the culture. Samples for the RNA extraction were collected at 1.25h after NPA  
 39 supplementation. Likewise, control samples where no NPA was added, were collected at the  
 40 same time point. A heatmap shows transcript expression level (TPM) under presence (+ NPA)  
 41 or absence of NPA (control) and Log<sub>2</sub>fold changes in the gene expression in the ten  
 42 differentially expressed genes in *Pseudomonas* sp. Nvir.

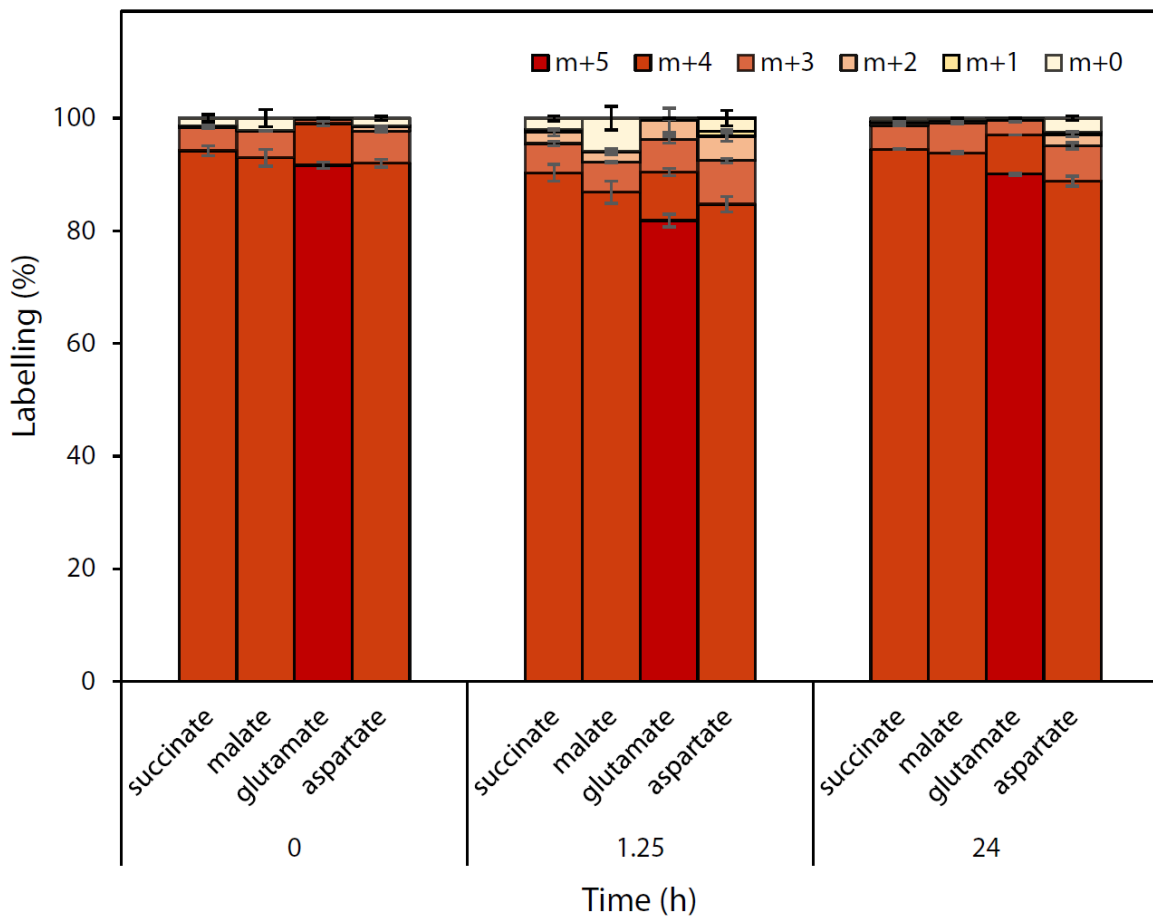

43  
 44 **Supplementary Figure 5. Elucidating the TCA cycle of *Pseudomonas* sp. Nvir with U-**  
 45 **<sup>13</sup>C-glucose.** Time-series of the mass isotopologue distributions of selected TCA cycle  
 46 metabolites during isotope tracer experiments. Cells were grown with U-<sup>13</sup>C-glucose and  
 47 received a pulse of U-<sup>12</sup>C-NPA at t=0. The m+5 fraction of glutamate and m+4 fractions of

48 succinate, malate, and aspartate represented the maximum level of labelling. All measured  
 49 metabolites represent the average of three biological replicates +/- standard errors.

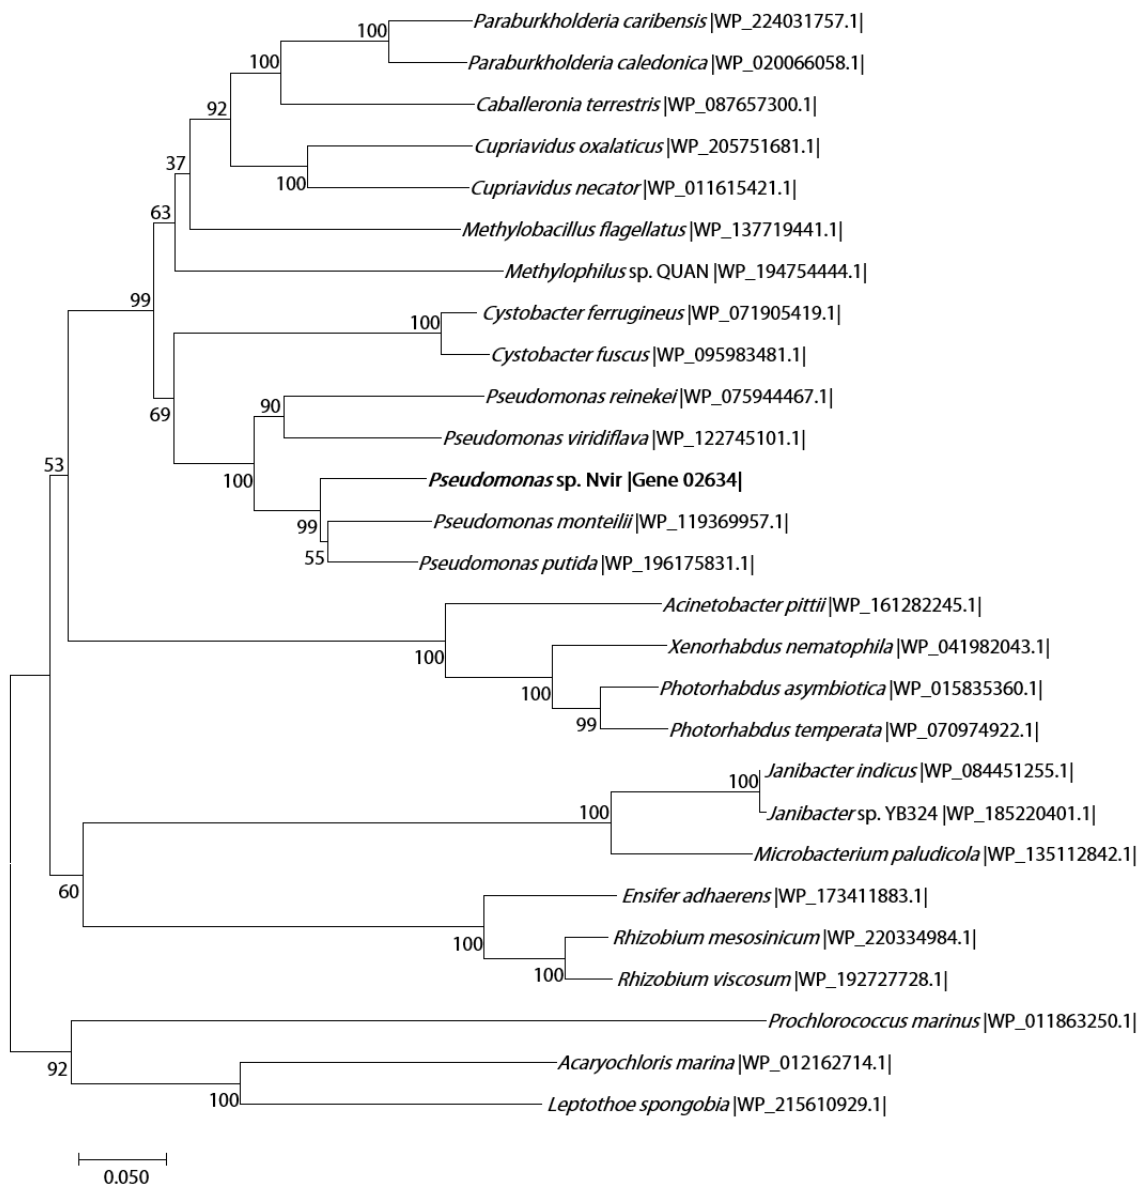

50

51 **Supplementary Figure 6. Distribution of the *pnmR* gene according to its amino acid**  
 52 **sequence.** Amino acid sequences were obtained from a BLASTp search from the NCBI  
 53 database. Sequences were aligned with MUSCLE and a phylogenetic tree was constructed  
 54 with MEGA7. The evolutionary history was inferred with the Neighbor-Joining method with 500  
 55 bootstraps.

56

## 57 Supplementary Materials & Methods

### 58 Synthesis of labelled $^{15}\text{N}$ -and $1\text{-}^{13}\text{C}$ -nitropropionic acid

59 All reagents were obtained from commercial suppliers and were used without purification.  
60 The  $^1\text{H}$ -NMR and  $^{13}\text{C}$ -NMR were recorded at 298K on a Bruker Avance III 400 (400 MHz) or  
61 500 (500 MHz) spectrometers. The same holds true for Correlation Spectroscopy (COSY),  
62 Heteronuclear single-quantum correlation spectroscopy (HSQC) and Heteronuclear multiple-  
63 bond correlation spectroscopy (HMBC), which were used for compound assignment. The  
64 chemical shifts in the spectra are reported in parts per million (ppm) relative to  
65 tetramethylsilane (TMS). The NMR data are presented in the following order: chemical shifts,  
66 multiplicity (s = singlet, d = doublet, t = triplet, td = triplet of doublets, m = multiplet and/or  
67 multiple resonances), coupling constants J in hertz (Hz), number of protons. The reactions  
68 were monitored by TLC-analysis using Silicagel F254 (Merk KGaA) by dipping in  $\text{KMnO}_4$   
69 followed by charring at ca. 150 °C. Purification by column chromatography was carried out  
70 using silica gel 60 (Merck, 0.040- 0.063 mm) or Automatic flash column chromatography on a  
71 Biotage Isolera Spektra One using SNAP or Silicycle cartridges (Biotage, 30-100  $\mu\text{m}$ , 60 Å)  
72 4g.

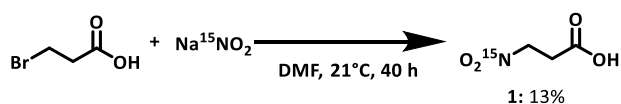

74 3-(nitro- $^{15}\text{N}$ )propanoic acid (1): 3-bromopropionic acid (191.6 mg, 1.25 mmol, 1 equiv.) was  
75 added to a stirred suspension of sodium nitrite- $^{15}\text{N}$  (104.3 mg, 1.49 mmol, 1.2 equiv.) in dry  
76 dimethylformamide (DMF, 5 mL) and the solution was stirred at room temperature for 40 hours.  
77 The reaction mixture was diluted with water (10 ml), adjusted to pH 1 with a 1M aqueous HCl  
78 solution and extracted with diethyl ether (6x15 ml). The combined organic layers were washed  
79 with brine (saturated NaCl aqueous solution; 50 mL), dried over  $\text{MgSO}_4$  and evaporated *in*  
80 *vacuo*. The crude product was purified using column chromatography (EtOAc:Heptane, 0 to  
81 100%), affording the desired product as a white solid (19 mg, 13%).  $^1\text{H}$  NMR (500 MHz, MeOD)



82  $\delta$ : 4.72 – 4.64 (m, 2H), 2.98 – 2.92 (m, 2H).  $^{13}\text{C}$  NMR (126 MHz, MeOD)  $\delta$ : 173.45, 71.01 (d,  
83  $J = 8.2$  Hz), 31.71.

84

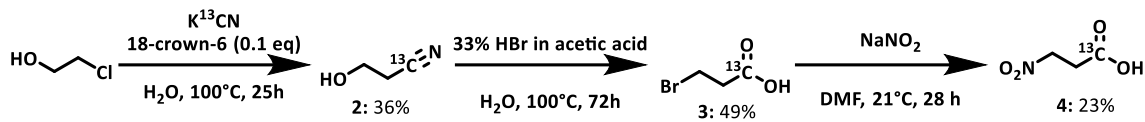

86 3-hydroxypropanenitrile-1- $^{13}\text{C}$  (2): A solution of 2-chloroethanol (0.167 mL, 200 mg, 2.48  
87 mmol, 1 equiv.), potassium cyanide- $^{13}\text{C}$  (171 mg, 2.59 mmol, 1.04 equiv.) and 18-crown-6  
88 (65.7 mg, 0.248 mmol, 0.1 equiv.) in water (5 mL) was refluxed for 25h. The solution was  
89 cooled to room temperature, extracted with EtOAc (6x10 mL) and dried over  $\text{MgSO}_4$ . The  
90 combined organic layers were evaporated and the crude product was purified using column  
91 chromatography (EtOAc:Heptane, 0 to 100%), affording the desired product as colourless  
92 liquid (64.3 mg, 36%).  $^1\text{H}$  NMR (400 MHz,  $\text{CDCl}_3$ )  $\delta$ : 3.88 (q,  $J = 6.3$  Hz, 1H), 2.65 – 2.55 (m,  
93 1H).

94 3-bromopropanoic-1- $^{13}\text{C}$  acid (3): A solution of 3-hydroxypropanenitrile-1- $^{13}\text{C}$  (64.3 mg, 0.89  
95 mmol) in a mixture of water (2 mL) and a 33% solution of HBr in acetic acid (3 mL) was heated  
96 at reflux. After 26h, another 3 mL of 33% HBr solution in acetic acid was added to the reaction  
97 mixture. The reaction was stopped after a total of 72h of reflux, cooled to room temperature,  
98 diluted with water (15 mL) and extracted with diethyl ether (6x15 mL). The combined organic  
99 layers were dried over  $\text{MgSO}_4$  and evaporated *in vacuo*. The crude was purified using column  
100 chromatography (EtOAc:Heptane, 0 to 100%), affording the desired product (67.2 mg, 49%).  
101  $^1\text{H}$  NMR (400 MHz,  $\text{CDCl}_3$ )  $\delta$ : 11.31 (s, 1H), 3.57 (td,  $J = 6.8, 5.1$  Hz, 1H), 3.04 – 2.94 (m, 1H).

102 3-nitropropanoic-1- $^{13}\text{C}$  acid (4): 3-bromopropanoic-1- $^{13}\text{C}$  acid (67.2 mg, 0.44 mmol, 1 equiv.)  
103 was added to a stirred suspension of sodium nitrite (59.2 mg, 0.96 mmol, 2 equiv.) in dry DMF  
104 (5 mL) and the solution was stirred at room temperature for 28 hours. The reaction mixture  
105 was diluted with water (10 ml), adjusted to pH 1 with a 1M aqueous HCl solution and extracted  
106 with EtOAc (6x15 ml). The combined organic layers were washed with brine (50 mL), dried

107 over  $\text{MgSO}_4$  and evaporated in vacuo. The crude product was purified using column  
108 chromatography (EtOAc:Heptane, 0 to 100%), affording the desired product (12.4 mg, 23%).  
109  $^1\text{H}$  NMR (500 MHz, MeOD)  $\delta$  4.71 – 4.63 (m, 2H), 2.99 – 2.91 (m, 2H).  $^{13}\text{C}$  NMR (126 MHz,  
110 MeOD)  $\delta$ : 173.5, 71.0, 31.7 (d,  $J = 53.3$  Hz).

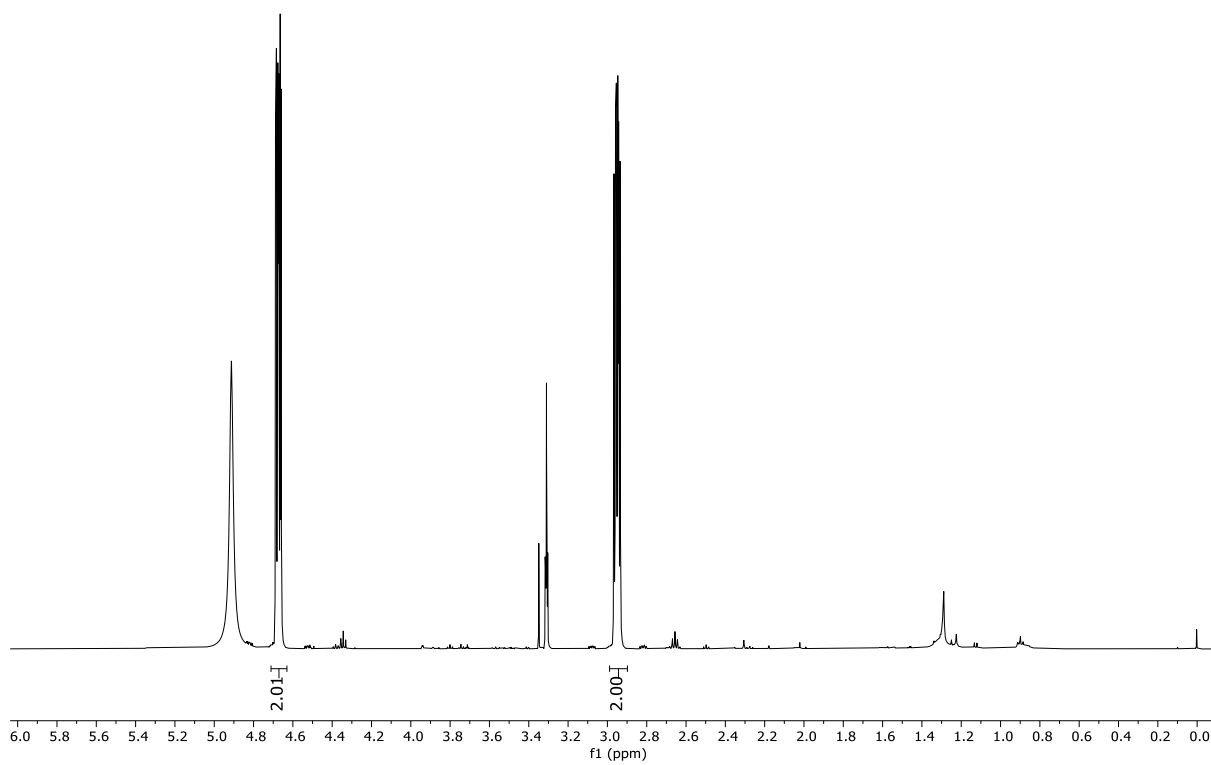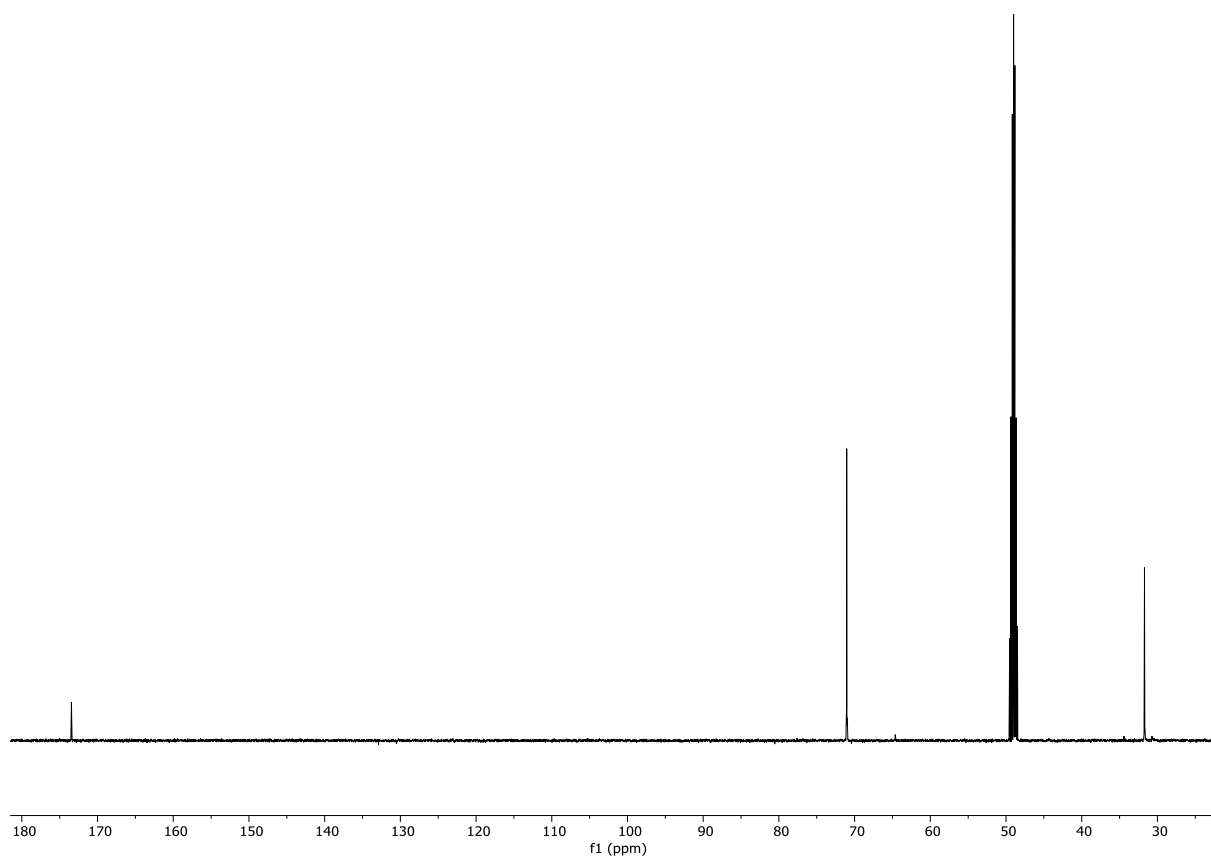

113 Figure 1:  $^1\text{H}$ - and  $^{13}\text{C}$ -NMR spectra of 3-(nitro- $^{15}\text{N}$ )propanoic acid (1)

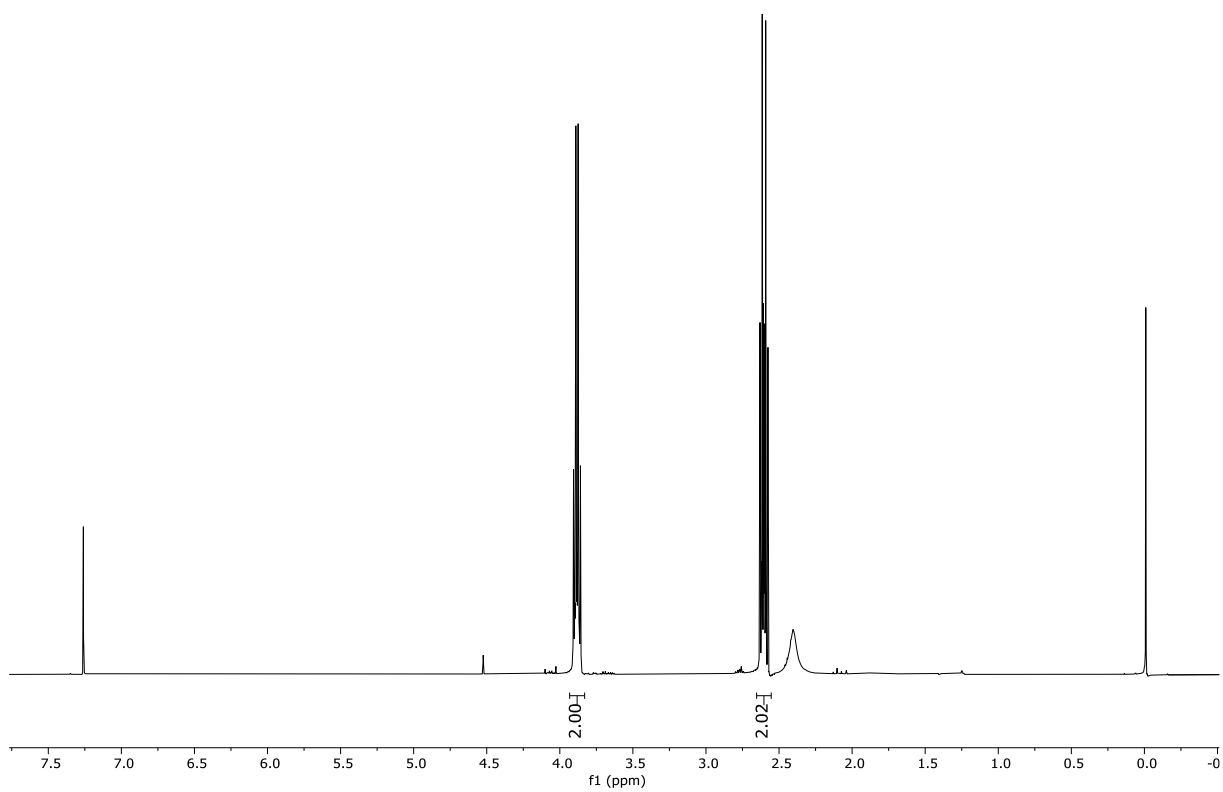

114

115 Figure 2: <sup>1</sup>H-NMR spectra of 3-hydroxypropanenitrile-1-<sup>13</sup>C (2)

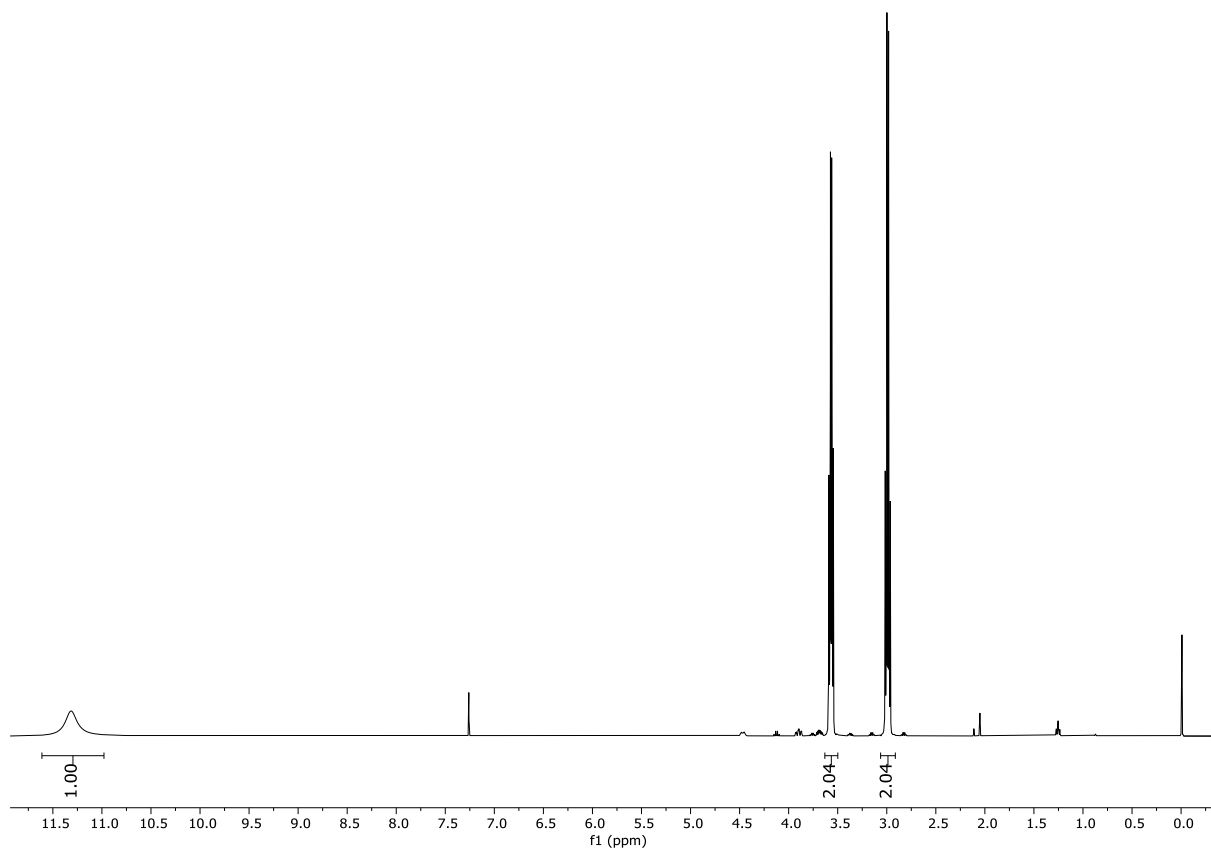

116

117 **Figure 3:**  $^1\text{H-NMR}$  spectra of 3-bromopropanoic- $1\text{-}^{13}\text{C}$  acid (3)

118

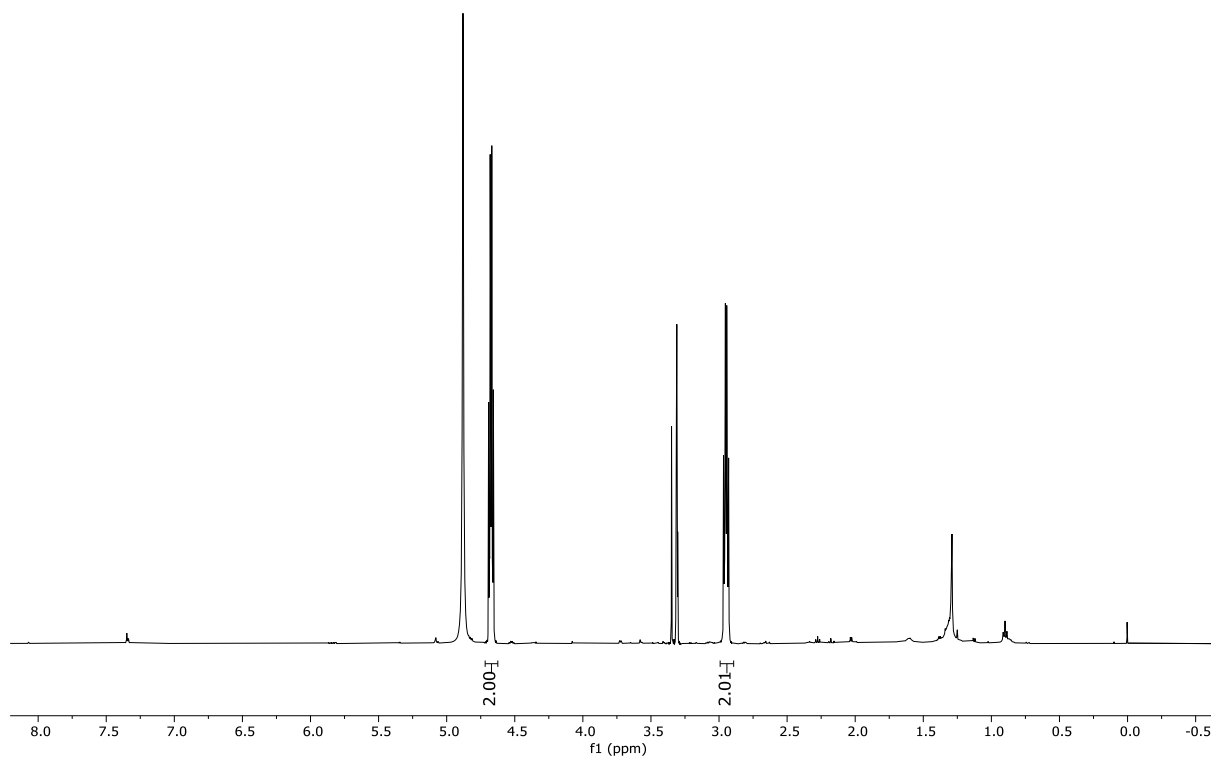

119

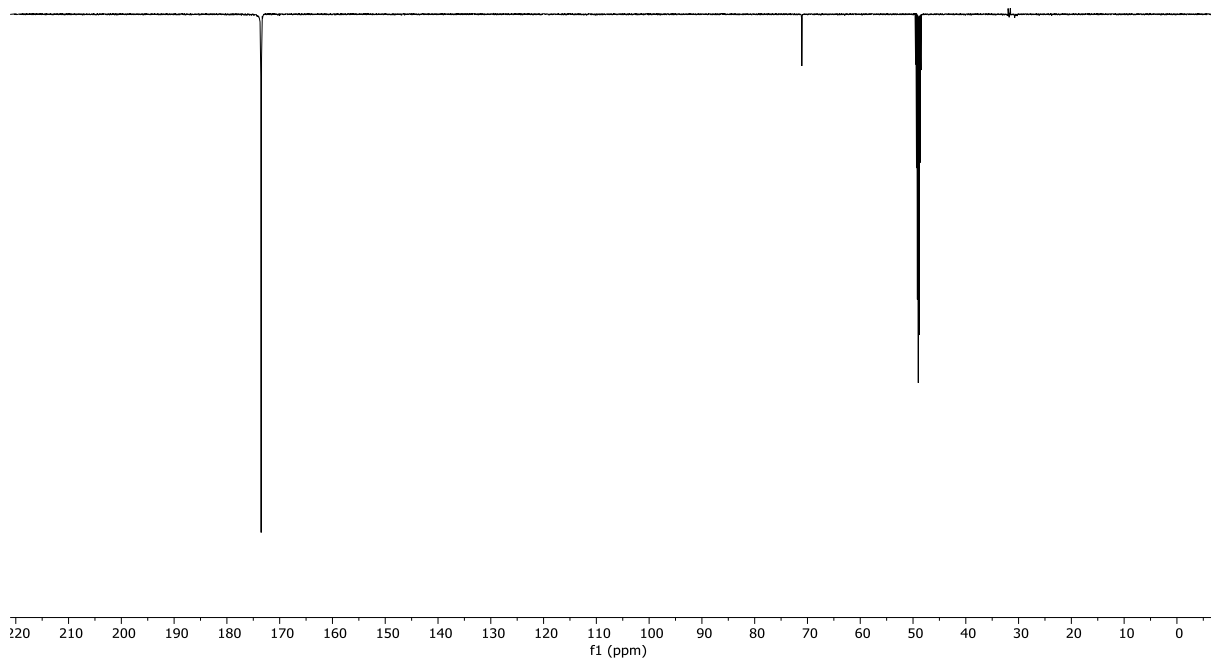

120 **Figure 4:**  $^1\text{H-}$  and  $^{13}\text{C-NMR}$  spectra of 3-nitropropanoic- $1-^{13}\text{C}$  acid (4)

121 **Supplementary literature**

- 122 1. Goris, J., K. T. Konstantinidis, J. A. Klappenbach, T. Coenye, P. Vandamme and J. M.  
123 Tiedje (2007). "DNA-DNA hybridization values and their relationship to whole-genome  
124 sequence similarities." Int J Syst Evol Microbiol **57**(Pt 1): 81-91.
- 125 2. Rodriguez-R, L. M. and K. T. Konstantinidis (2016). The enveomics collection: a toolbox  
126 for specialized analyses of microbial genomes and metagenomes, PeerJ Preprints.

127
